# Supplementary material for: A Review of Potential on Possible Greener Production of Slow-Release Nitrogen Fertilizer: From Fundamentals of Plasma and Nanotechnology Application
Source: Preprints.org preprint supplement (doi:10.20944/preprints202409.2395.v1), 2024-09-30
Supplement: Supplementary file 1 [file supplementary]

**For research article**

| Response to Reviewer Comments | | |
| --- | --- | --- |
| **1. Summary** |  |  |
| *Thank you for your input, which has been invaluable in helping us refine the manuscript. Please find the detailed responses below and the corresponding corrections in track changes in the re-submitted file.* | | |
| **3. Point-by-point response to Comments and Suggestions for Authors** | | |
|  | | |
| **Comments 1:**Dear Authors, I have read the latest version of your manuscript, and in my opinion, it is of potential interest to the Sustainability audience. and some critical aspects in the smarter production of fertilizers have been examined, in my opinion, the paper needs to bring into discussion the following aspects: 1) a short list of common methods for preparing nano fertilizers to be compared with those discussed in this paper and implications for their use in terms of administration timing, equipment needed, shelf life .... This can be synthesized into a table with no more than a dozen of references **Response 1:** Table 3, which lists the preparation methods based on the N source, nanoparticles used, and their preparation methods for a given nutrient release period, has been developed and included in the text on pages 21-22. The table offers various alternatives to selecting the best nanomaterials for transforming plasma N and other N sources into slow-release forms. Actually, the methods discussed in the manuscript encompass several techniques listed in the table, including matrix, encapsulation, and coating methods, which can be broadly categorized as coating techniques.  **Comments 2:**more evidence on the nutrient use efficiency of different nano fertilizers and of nano fertilizers as compared to bulk fertilizers can be synthesized into a table with no more than a dozen of references **Response 2:** Thank you for your thoughtful and insightful comment, which highlights the importance of evaluating nutrient use efficiency (NUE) across various nano and bulk fertilizers. We wholeheartedly agree that a comprehensive comparison of NUE would significantly enhance the depth and validity of our manuscript. In response, we have compiled Table 4, which summarizes existing research on NUE of different nano and bulk fertilizers (Pages 23-25). This table provides a concise overview of:   1. Nano fertilizer types (e.g., nano-NPK, nano-urea) 2. Bulk fertilizer counterparts (e.g., conventional NPK, urea) 3. Corresponding NUE percentages 4. Relevant crops and application conditions 5. Key references   **Comments 3.** The position of the Authors on the global sustainability of the proposed innovative technologies is based on the above points (1) and (2) because the nanofertilizers have provided variable efficiency in the NUE. A greener production of less efficient fertilizers could have a greater environmental impact.  **Response 3:** *Thank you for showing the crucial concerns regarding the global sustainability of our proposed innovative nano fertilizer technologies. We understand that variable efficiency in Nitrogen Use Efficiency (NUE) and potential environmental impacts are essential to consider. Our perspective on the global sustainability of the proposed innovative technologies involves the following:*   - *Integrating renewable energy sources in nano fertilizer production.* - *Developing biodegradable or recyclable nano fertilizer carriers.* - *Implementing precision agriculture techniques for targeted applications.*   *Therefore, combining all four tables can help select a sustainable production strategy. Section 6 (pages 19-28) thoroughly explains the appropriate methods. The strategies focus on resource consumption, energy requirements, emissions reduction, soil health improvement, and sustainable food production. These strategies contribute to environmental sustainability and can reduce production costs and increase crop yields, making them attractive for investment and policy support.* | | |

**Comments 4** The text needs an improvement of the English style in different sections; I report below some examples of revisions needed.
line 516: Reword the sentence as: 'The effect is because nanoparticles can agglomerate to form large clumps difficult to redisperse [76].'.
Line 535: replace 'Adopted' by 'Adapted'.
Line 799: please reword this sentence to improve the English style,

For these reasons I suggest another moderate revision round

**Response 4:** *Thank you for your thorough review and helpful suggestions to enhance the English style in our manuscript. We appreciate your attention to detail. I have reviewed sentence structure and wording for clarity (lines 16-17), checked vocabulary precision (line 535), and ensured terminology consistency (lines 811-813).*
